# Supplementary material for: Characterization of Sideritis clandestina subsp. peloponnesiaca Polar Glycosides and Phytochemical Comparison to Other Mountain Tea Populations
Source: MDPI journal article supplement (doi:10.3390/molecules27217613), 2022-11-06
Supplement: s1 [file s1]

## SUPPLEMENTARY INFORMATION

### **Characterization of *Sideritis clandestina* subsp. *peloponnesiaca* polar glycosides and phytochemical comparison to other mountain tea populations**

**Virginia D. Dimaki <sup>a</sup>, Konstantina Zeliou <sup>a</sup>, Fotini Nakka <sup>a</sup>, Michaela Stavreli <sup>a</sup>, Ioannis Bakratsas <sup>a</sup>, Ligeri Papaioannou <sup>a, b</sup>, Gregoris Iatrou <sup>b</sup>, Fotini N. Lamari <sup>a, \*</sup>**

<sup>a</sup> Laboratory of Pharmacognosy & Chemistry of Natural Products, Department of Pharmacy, University of Patras, Rio University Campus, 26504 Patras, Greece

<sup>b</sup> Division of Plant Biology, Department of Biology, University of Patras, Rio University Campus, 26504 Patras, Greece

\* Corresponding author. E-mail: flam@upatras.gr. Tel.: +30 2610962335.

#### **Part A. Structure elucidation of isolated compounds**

#### **Part B. Other Data**

## Part A. Structure elucidation of isolated compounds

## Monomelittoside (1)

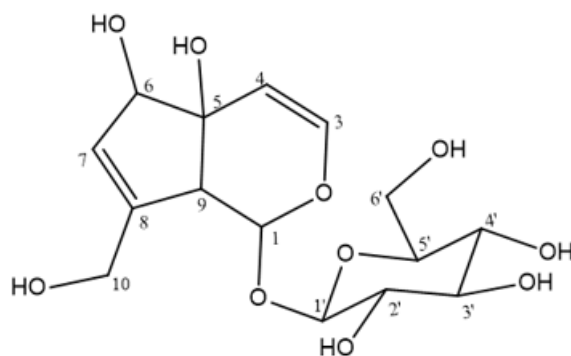**Table S1.**  $^1\text{H}$ -NMR (600 MHz) data of monomelittoside (1) in  $\text{D}_2\text{O}$ .

| Position    | $\delta_{\text{H}}$ (ppm, $J$ in Hz) |
|-------------|--------------------------------------|
| 1           | 5.73 (d, $J=2.6$ )                   |
| 3           | 6.37 (d, $J=6.4$ )                   |
| 4           | 5.07 (dd, $J=6.3, 1.2$ )             |
| 5           | -                                    |
| 6           | 4.24 (brs)                           |
| 7           | 5.89 (brs)                           |
| 8           | -                                    |
| 9           | 3.22 (brs)                           |
| 10          | 4.26 (s)                             |
| 1'          | *                                    |
| 2' 3' 4' 5' | 3.55-3.42 (m) **                     |
| 6a'         | 3.96 (dd, $J=12.4, 2.1$ )            |
| 6b'         | 3.76 (dd, $J=12.4, 6.0$ )            |

\*overlapped by the signal of the solvent \*\*assignments overlapped

# SUPPLEMENTARY INFORMATION

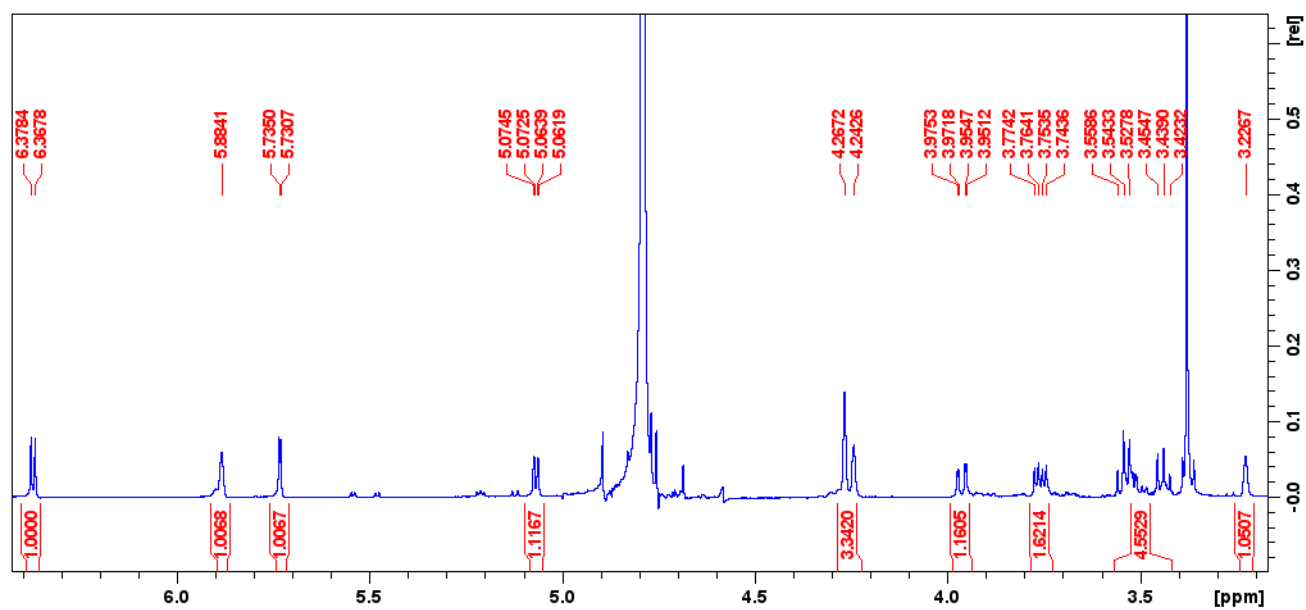

**Figure S1.** <sup>1</sup>H-NMR spectrum of monomelittoside (1) (<sup>1</sup>H-NMR:600 MHz; D<sub>2</sub>O)

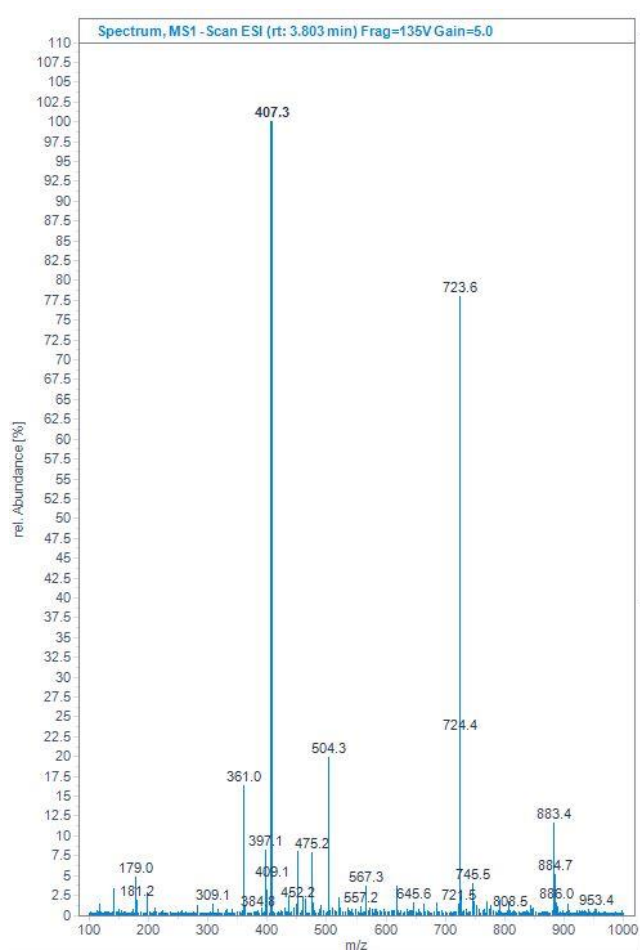

**Figure S2.** MS spectrum of monomelittoside (1) in negative mode. The major ions were 407 [M+FA-H]<sup>-</sup>, 361 [M-H]<sup>-</sup> and 723 [2M-H]<sup>-</sup>.

## SUPPLEMENTARY INFORMATION

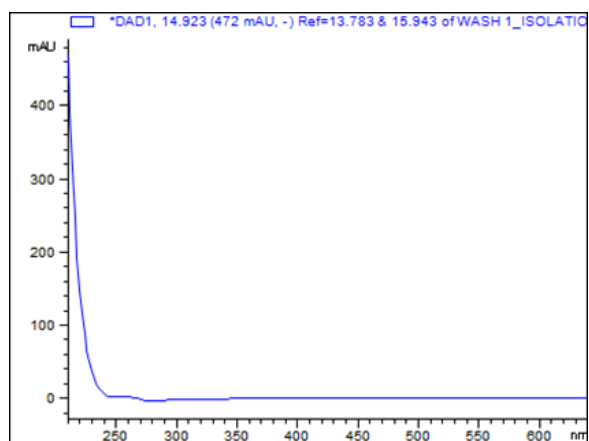

**Figure S3.** UV-vis spectrum of monomelittoside (**1**) showing a  $\lambda_{\text{max}}$  of 210 nm.

**Melittoside (2)**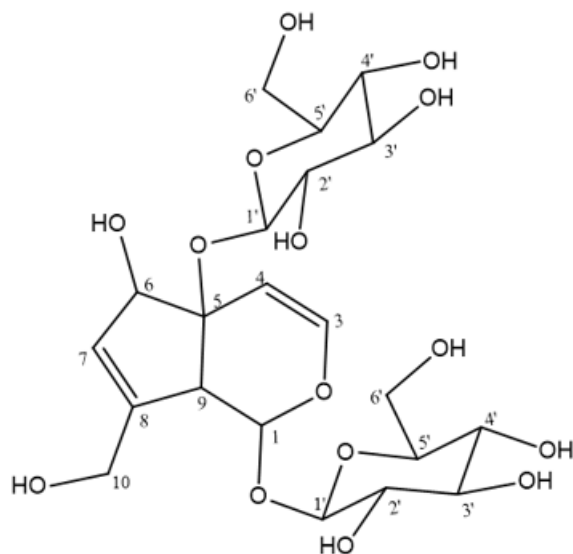**Table S2.**  $^1\text{H}$ -NMR (600 MHz) and  $^{13}\text{C}$ -NMR (150 MHz) data of melittoside (**2**) in  $\text{D}_2\text{O}$ 

| Position  | $\delta_{\text{H}}$ (ppm, $J$ in Hz) | $\delta_{\text{C}}$ (ppm) |
|-----------|--------------------------------------|---------------------------|
| 1         | 5.48 (d, $J=5.4$ )                   | 95.2                      |
| 3         | 6.55 (d, $J=6.4$ )                   | 143.4                     |
| 4         | 5.21 (d, $J=6.4$ )                   | 104.7                     |
| 5         | -                                    | 80.7                      |
| 6         | 4.63 (s)                             | 79.6                      |
| 7         | 5.90 (brs)                           | 127.6                     |
| 8         | -                                    | 144.6                     |
| 9         | 3.56-3.35 (m)**                      | 50.6                      |
| 10        | 4.33-4.25 (m)                        | 59.6                      |
| 1'        | *                                    | 98.0                      |
| 2'        | 3.56-3.35 (m)**                      | 72.8                      |
| 3'        | 3.56-3.35 (m)**                      | 75.6                      |
| 4'        | 3.56-3.35 (m)**                      | 69.3                      |
| 5'        | 3.56-3.35 (m)**                      | 75.5                      |
| 6a' 6b'   | 3.94-3.90 (m)                        | 60.5                      |
| 1''       | *                                    | 97.8                      |
| 2''       | 3.56-3.35 (m)**                      | 73.1                      |
| 3''       | 3.56-3.35 (m)**                      | 76.2                      |
| 4''       | 3.56-3.35 (m)**                      | 69.4                      |
| 5''       | 3.56-3.35 (m)**                      | 75.7                      |
| 6a'' 6b'' | 3.76 (dd, $J=12.4, 5.3$ )            | 60.6                      |

\*Overlapped by the signal of the solvent \*\*assignments overlapped

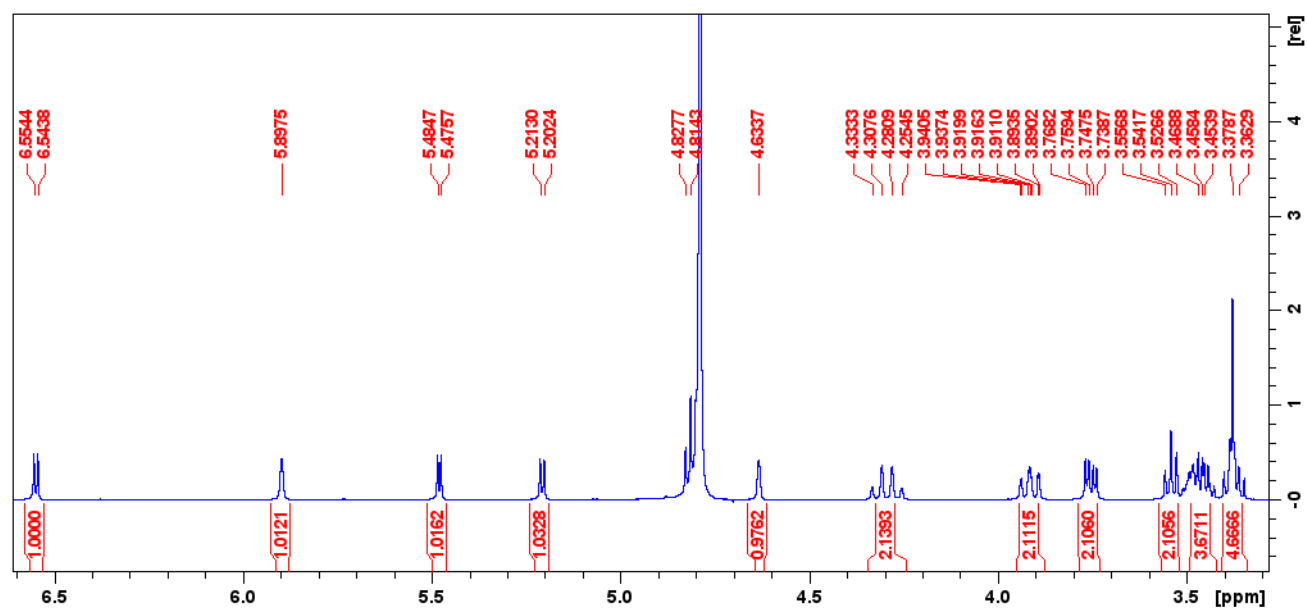

**Figure S4.** <sup>1</sup>H-NMR spectrum of melittoside (**2**) (<sup>1</sup>H-NMR:600 MHz; D<sub>2</sub>O)

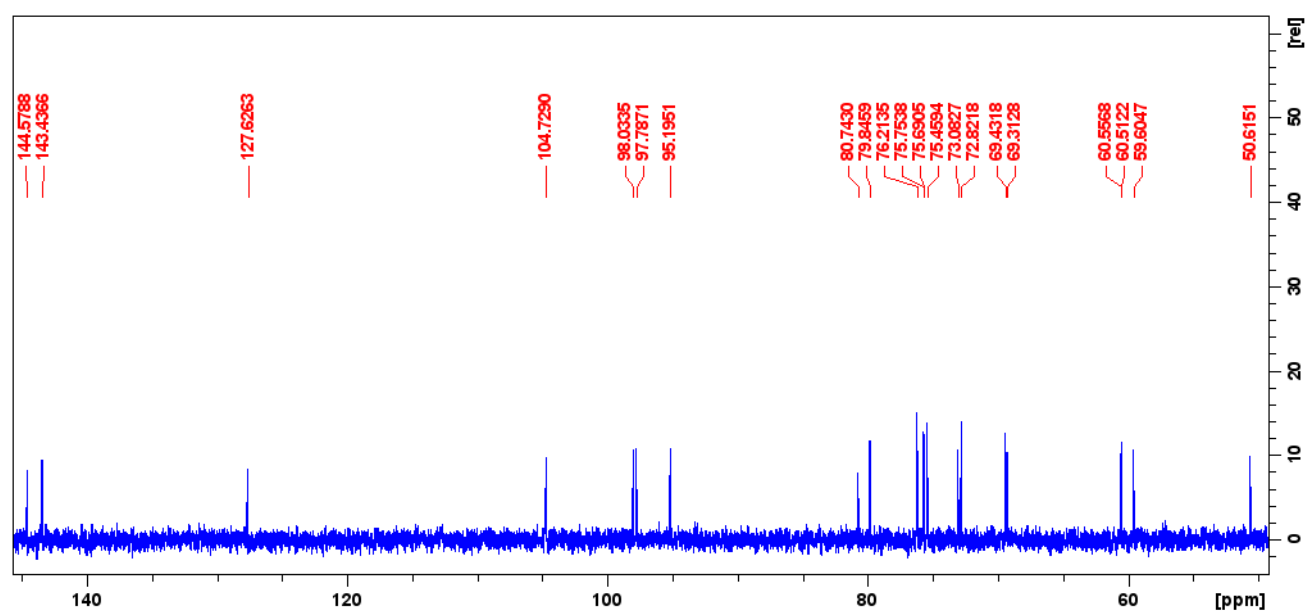

**Figure S5.** <sup>13</sup>C-NMR spectrum of melittoside (**2**) (<sup>13</sup>C-NMR:150 MHz; D<sub>2</sub>O)

## SUPPLEMENTARY INFORMATION

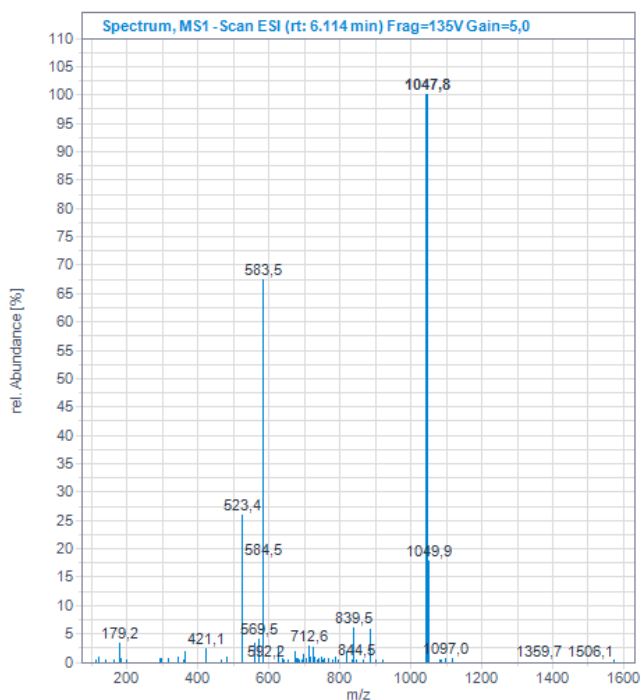

**Figure S6.** MS spectrum of melittoside (**2**) in negative mode. The major ions were 523 [M-H]<sup>-</sup>, 583 [M+Hac-H]<sup>-</sup> and 1047 [2M-H]<sup>-</sup>.

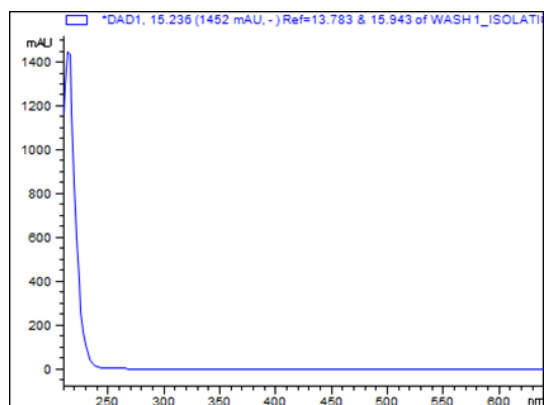

**Figure S7.** UV-vis spectrum of melittoside (**2**) showing a maximum absorbance at 210 nm.

Vanillic acid glucoside (**3**)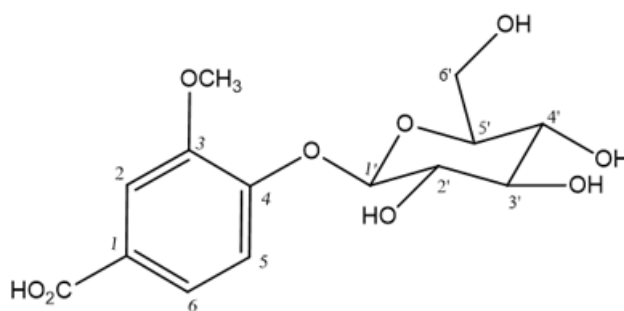**Table S3**  $^1\text{H}$ -NMR (600 MHz) Data of vanillic acid glucoside (**3**) in  $\text{D}_2\text{O}$ .

| Position | $\delta_{\text{H}}$ (ppm, $J$ in Hz) |
|----------|--------------------------------------|
| 1        | -                                    |
| 2        | 7.61 (d, $J=1.9$ )                   |
| 3        | -                                    |
| 4        | -                                    |
| 5        | 7.23 (d, $J=8.5$ )                   |
| 6        | 7.54 (dd, $J=8.4, 1.9$ )             |
| 7        | -                                    |
| 8        | 3.96 (s)                             |
| 1'       | 5.24 (d, $J=7.4$ )                   |
| 2' 3' 5' | 3.69-3.65 (m)**                      |
| 4'       | 3.54-3.58 (m)                        |
| 6a'      | 3.81 (d, $J=5.5$ )                   |
| 6b'      | 3.78 (d, $J=5.4$ )                   |

\*\*assignments overlapped

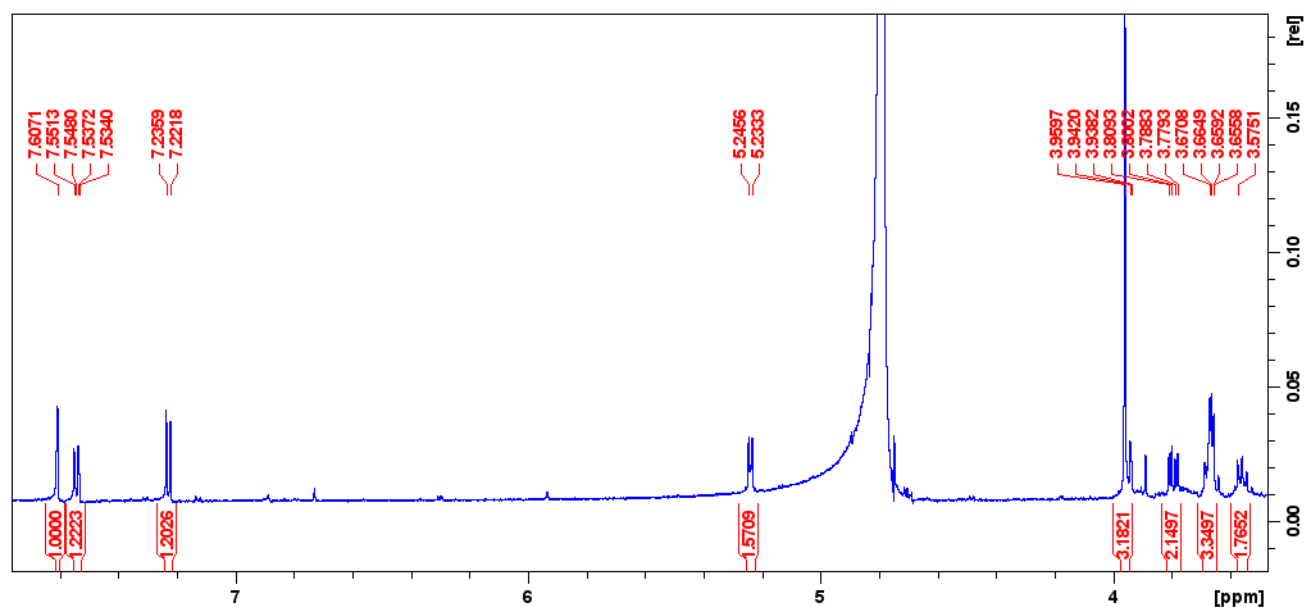**Figure S8.**  $^1\text{H}$ -NMR spectrum of vanillic acid glucoside (**3**) ( $^1\text{H}$ -NMR:600 MHz;  $\text{D}_2\text{O}$ )



## SUPPLEMENTARY INFORMATION

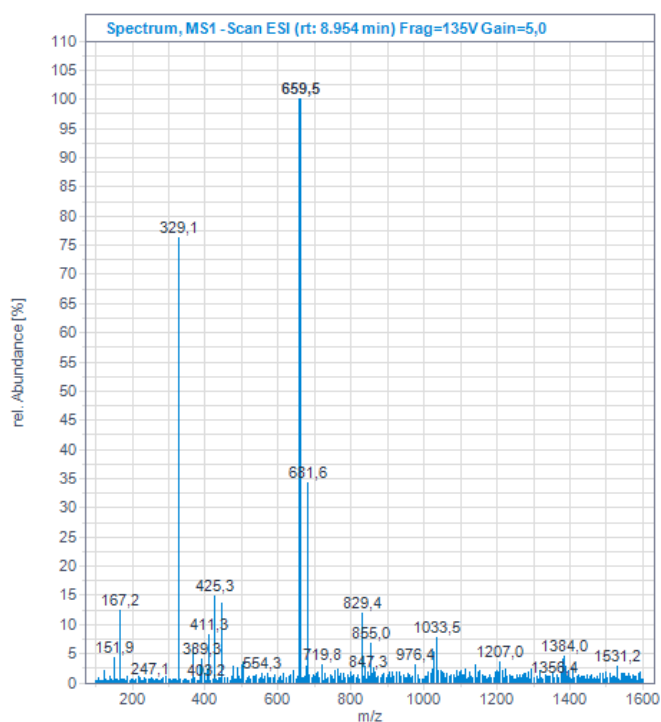

**Figure S9.** MS spectrum of vanillic acid glucoside (3) in negative mode. The major ions were 659 [2M-H]<sup>-</sup> and 329 [M-H]<sup>-</sup>.

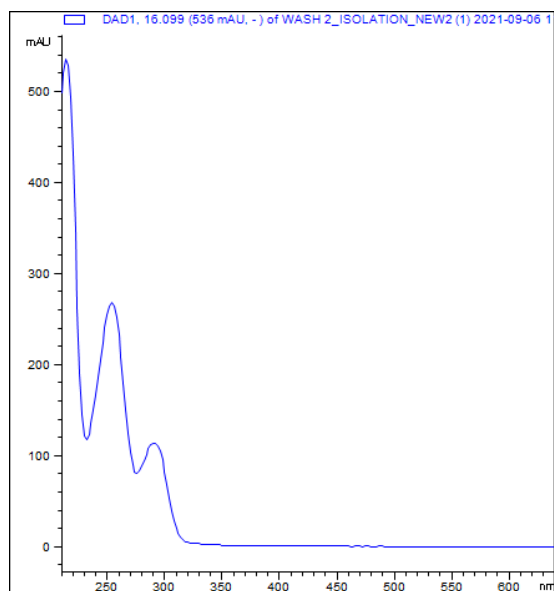

**Figure S10.** UV spectrum of vanillic acid glucoside (3). Maximum absorbance at 210, 254 and 290 nm.

## Ajugoside (4)

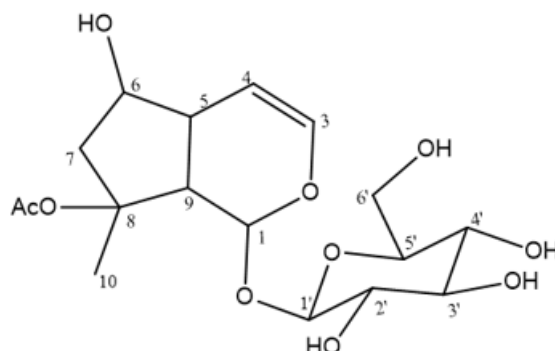**Table S4.**  $^1\text{H-NMR}$  (600 MHz) data of ajugoside (4) in  $\text{D}_2\text{O}$ 

| Position       | $\delta_{\text{H}}$ (ppm, $J$ in Hz) |
|----------------|--------------------------------------|
| 1              | 5.93 (s)                             |
| 3              | 6.30 (dd, $J=6.3, 2.1$ )             |
| 4              | 4.87 (d, $J=6.4$ )                   |
| 5              | 2.85 (d, $J=8.3$ )                   |
| 6              | 4.18 (d, $J=4.3$ )                   |
| 7a             | 2.19 (d, $J=15.3$ )                  |
| 7b             | 2.24 (d, $J=15.5$ )                  |
| 8              | -                                    |
| 9              | 2.92 (d, $J=8.4$ )                   |
| 10             | 1.57 (s)                             |
| 1'             | *                                    |
| 2' 3' 4' 5' 6' | 4.16-3.41 (m)**                      |

\*overlapped by the signal of the solvent \*\*assignments overlapped

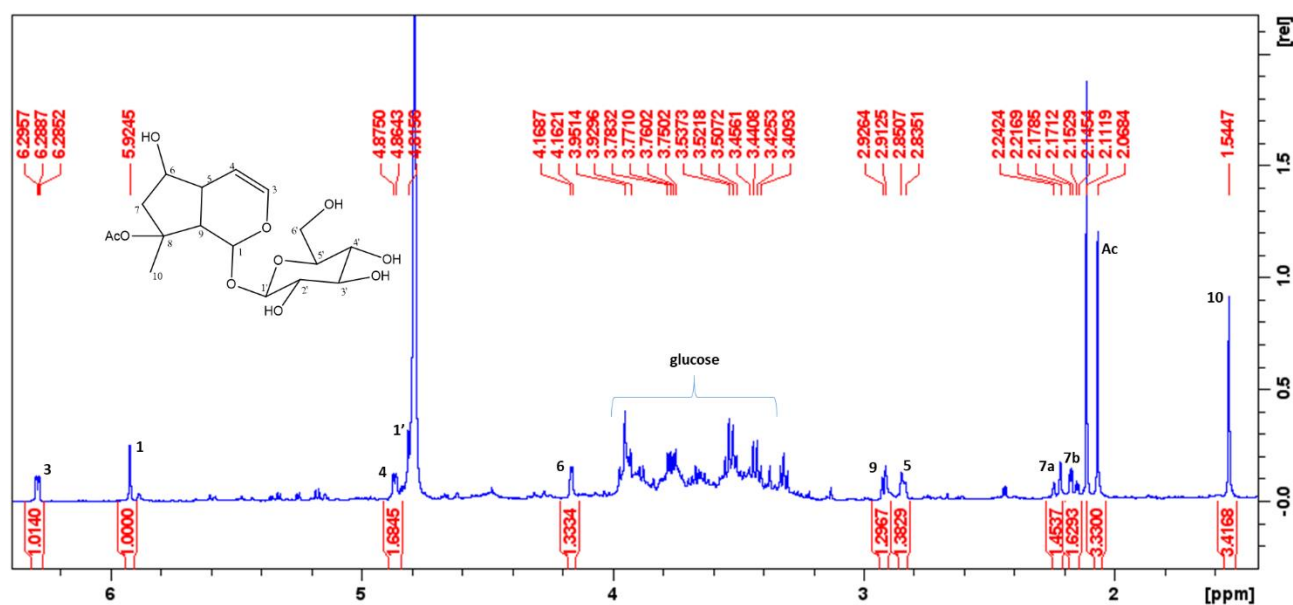**Figure S11.**  $^1\text{H-NMR}$  spectrum of ajugoside (4) ( $^1\text{H-NMR}$ :600 MHz;  $\text{D}_2\text{O}$ )

## SUPPLEMENTARY INFORMATION

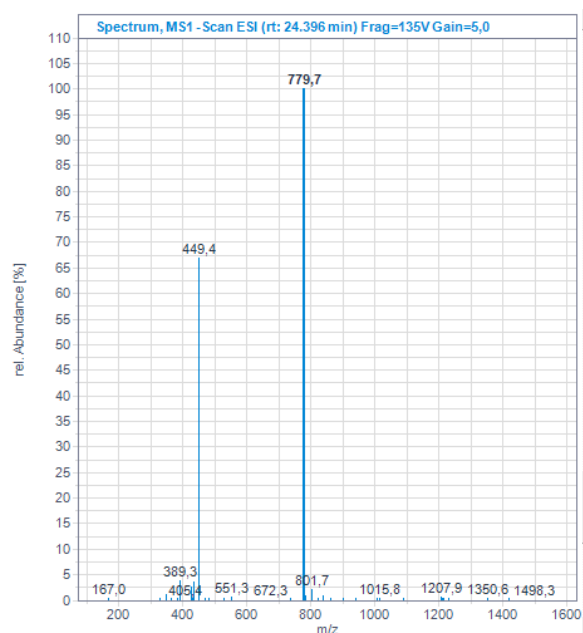

**Figure S12.** MS spectrum of ajugoside (4) in negative mode. The major ions were 449  $[M+Hac-H]^-$  and 779  $[2M-H]^-$ .

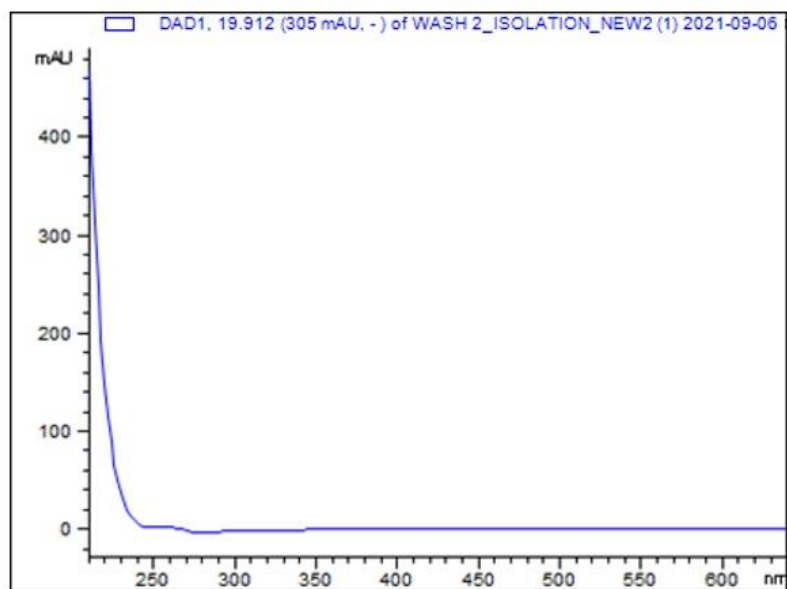

**Figure S13.** UV-vis spectrum of ajugoside (4). Maximum absorbance at 200 nm.

Salicylic acid glucoside (**5**)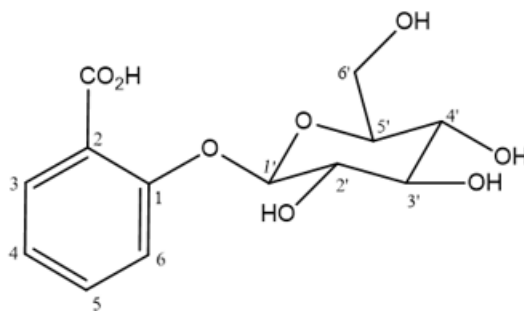**Table S5.**  $^1\text{H}$ -NMR data of salicylic acid glucoside (**5**) ( $\text{D}_2\text{O}$ ).

| Position    | $\delta_{\text{H}}$ (ppm, $J$ in Hz) |
|-------------|--------------------------------------|
| 1           | -                                    |
| 2           | -                                    |
| 3           | 7.46-7.42 (m)**                      |
| 4           | 7.18 (t, $J=7.4$ )                   |
| 5           | 7.46-7.42 (m)**                      |
| 6           | 7.26 (d, $J=8.3$ )                   |
| 1'          | 5.10 (d, $J=7.3$ )                   |
| 2' 3' 4' 5' | 3.66-3.52 (m)**                      |
| 6a'         | 3.97 (dd, $J=12.4, 2.1$ )            |
| 6b'         | 3.80 (dd, $J=12.5, 5.7$ )            |

\*\*assignments overlapped

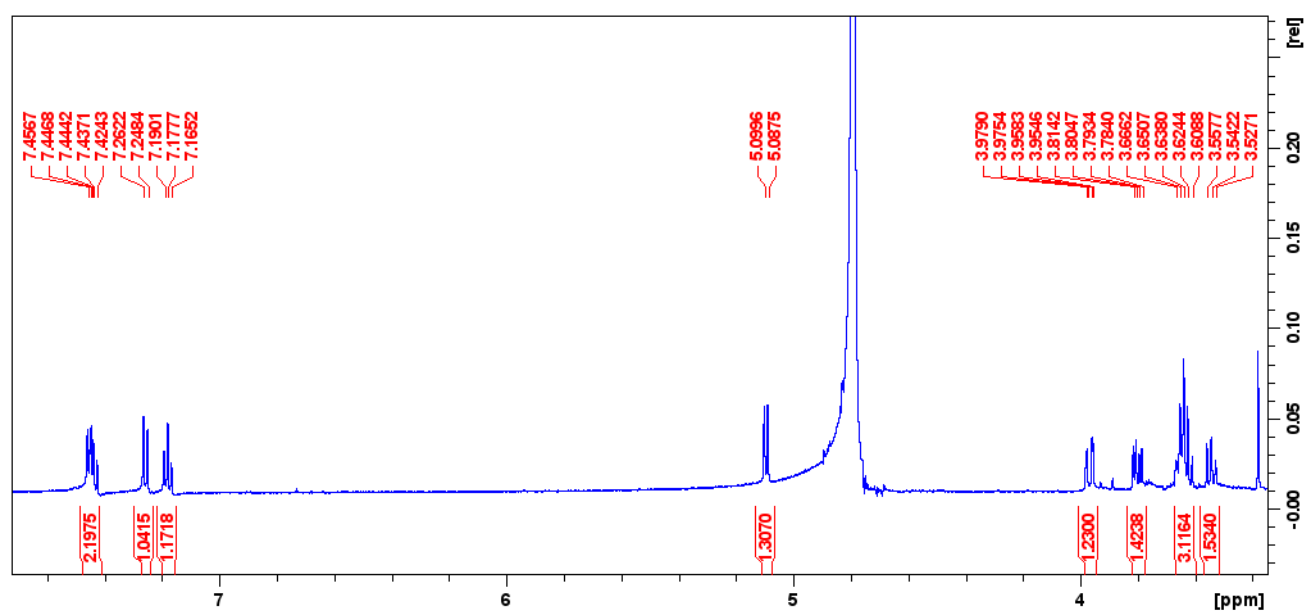**Figure S14.**  $^1\text{H}$ -NMR spectrum of salicylic acid glucoside (**5**) ( $^1\text{H}$ -NMR:600 MHz;  $\text{D}_2\text{O}$ )

## SUPPLEMENTARY INFORMATION

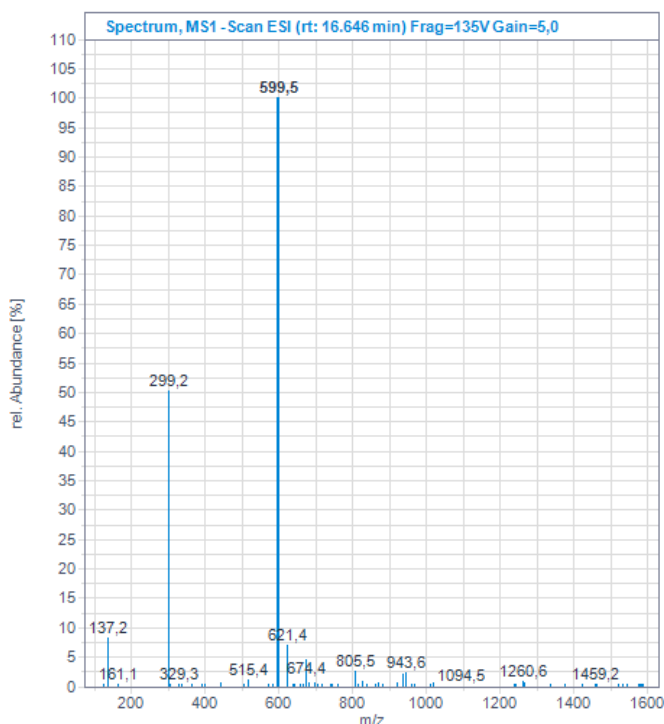

**Figure S15.** MS spectrum of salicylic acid glucoside (**5**) in negative mode. The major ions of 299 and 599 correspond to  $[M-H]^-$  and  $[2M-H]^-$ .

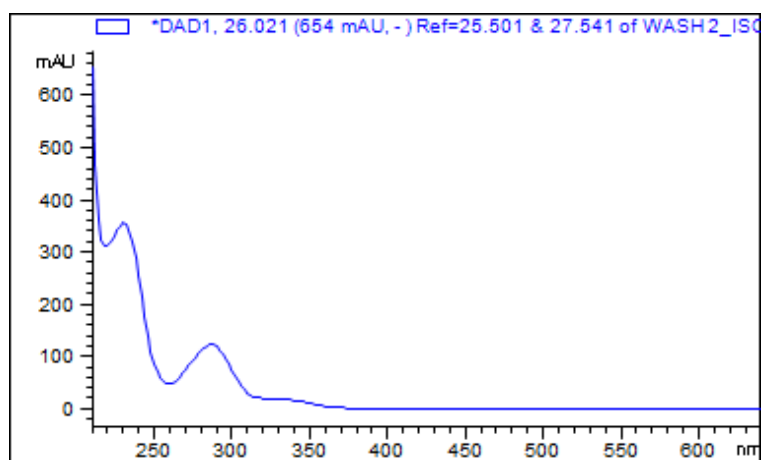

**Figure S16.** UV-vis spectrum of salicylic acid glucoside (**5**) having maximum absorbance at 230 and 286 nm.

**7-O-acetyl-8-epi-loganic acid (6)**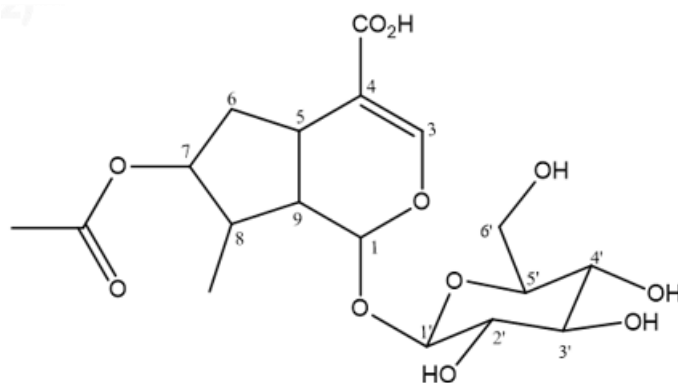**Table S6.**  $^1\text{H}$ -NMR data of 7-O-acetyl-8-epi-loganic acid (6) ( $\text{D}_2\text{O}$ )

| Position          | $\delta_{\text{H}}$ (ppm, $J$ in Hz) |
|-------------------|--------------------------------------|
| 1                 | 5.60 (d, $J=2.7$ )                   |
| 3                 | 7.32 (s)                             |
| 4                 | -                                    |
| 5                 | 3.09 (m)                             |
| 6a                | 1.98 (dt, $J=14.4, 11.8$ )           |
| 6b                | 2.23 (m)                             |
| 7                 | *                                    |
| 8                 | 2.46 (m)                             |
| 9                 | 2.75 (m)                             |
| 10                | 1.03 (d, $J=7.5$ )                   |
| 1'                | *                                    |
| 2'                | 3.30 (dd, $J=9.3, 8.2$ )             |
| 3'                | 3.55-3.41 (m)**                      |
| 4'                | 3.55-3.41 (m)**                      |
| 5'                | 3.55-3.41 (m)**                      |
| 6a'               | 3.76 (dd, $J=12.4, 6.0$ )            |
| 6b'               | 3.96 (dd, $J=12.3, 2.1$ )            |
| COCH <sub>3</sub> | 2.1 (s)                              |

\*overlapped by the signal of the solvent \*\*assignments overlapped

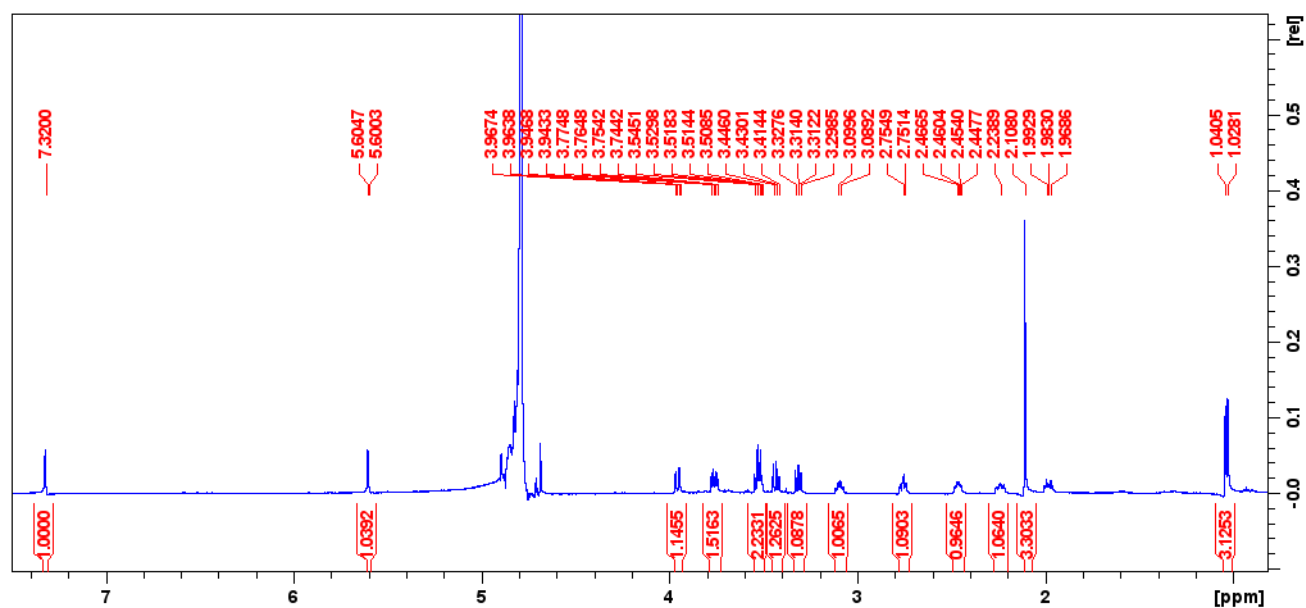

**Figure S17**  $^1\text{H}$ -NMR spectrum of 7-O-acetyl-8-epi-loganic acid (**6**) ( $^1\text{H}$ -NMR:600 MHz;  $\text{D}_2\text{O}$ )

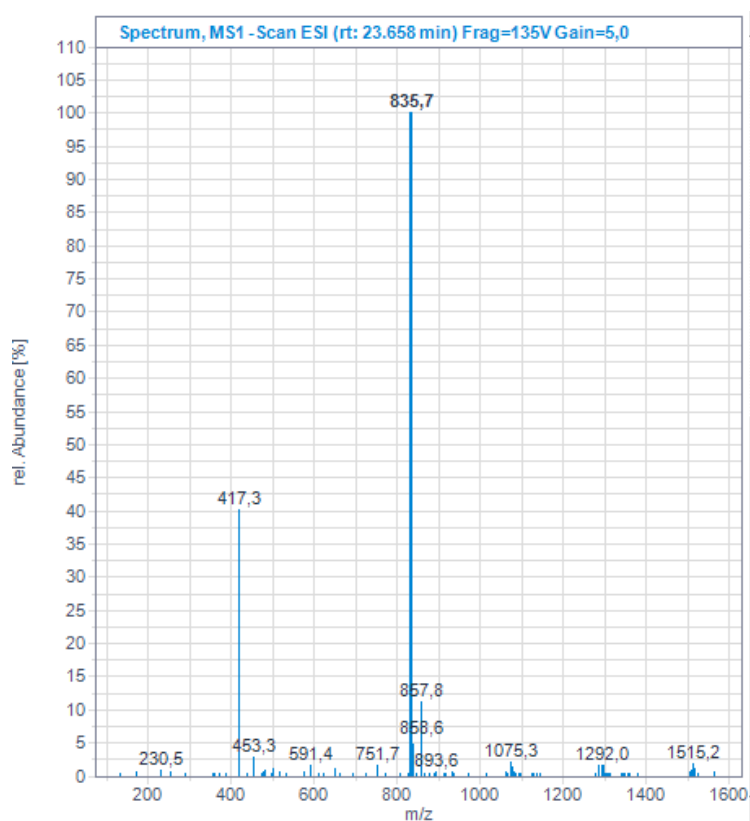

**Figure S18.** MS spectrum of 7-O-acetyl-8-epi-loganic acid (**6**) in negative mode. The major ions were 417  $[\text{M}-\text{H}]^-$  and 835  $[2\text{M}-\text{H}]^-$ .

## SUPPLEMENTARY INFORMATION

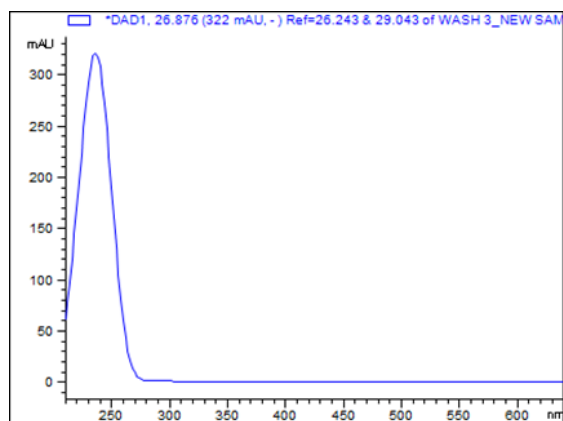

**Figure S19.** UV spectrum of 7-O-acetyl-8-epi-loganic acid (**6**) with maximum absorbance at 236 nm.



### Chlorogenic acid (7)

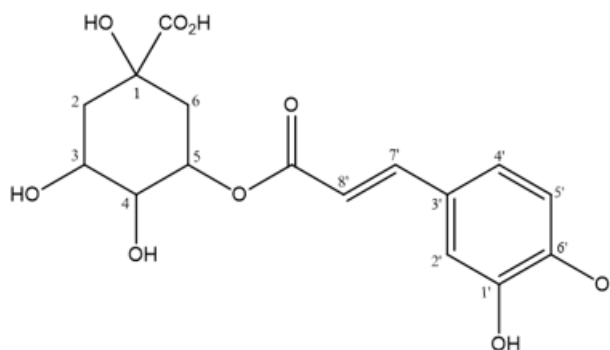

**Table S7.**  $^1\text{H}$ -NMR data of chlorogenic acid (7) ( $\text{CD}_3\text{OD}$ )

| Position | $\delta_{\text{H}}$ (ppm, $J$ in Hz) |
|----------|--------------------------------------|
| 1'       | -                                    |
| 2'       | 7.04 (d, $J=1.8$ )                   |
| 3'       | -                                    |
| 4'       | -                                    |
| 5'       | 6.77 (d, $J=8.2$ )                   |
| 6'       | 6.94 (dd, $J=8.1, 1.6$ )             |
| 7'       | 7.56 (d, $J=15.9$ )                  |
| 8'       | 6.28 (d, $J=15.9$ )                  |
| 9'       | -                                    |
| 1        | -                                    |
| 2        | 2.22-2.01 (m)**                      |
| 3        | 4.16 (brs)                           |
| 4        | 3.71 (dd, $J=9.2, 2.2$ )             |
| 5        | 5.35-5.31 (m)                        |
| 6        | 2.23-2.03 (m)**                      |

\*\*assignments overlapped

# SUPPLEMENTARY INFORMATION

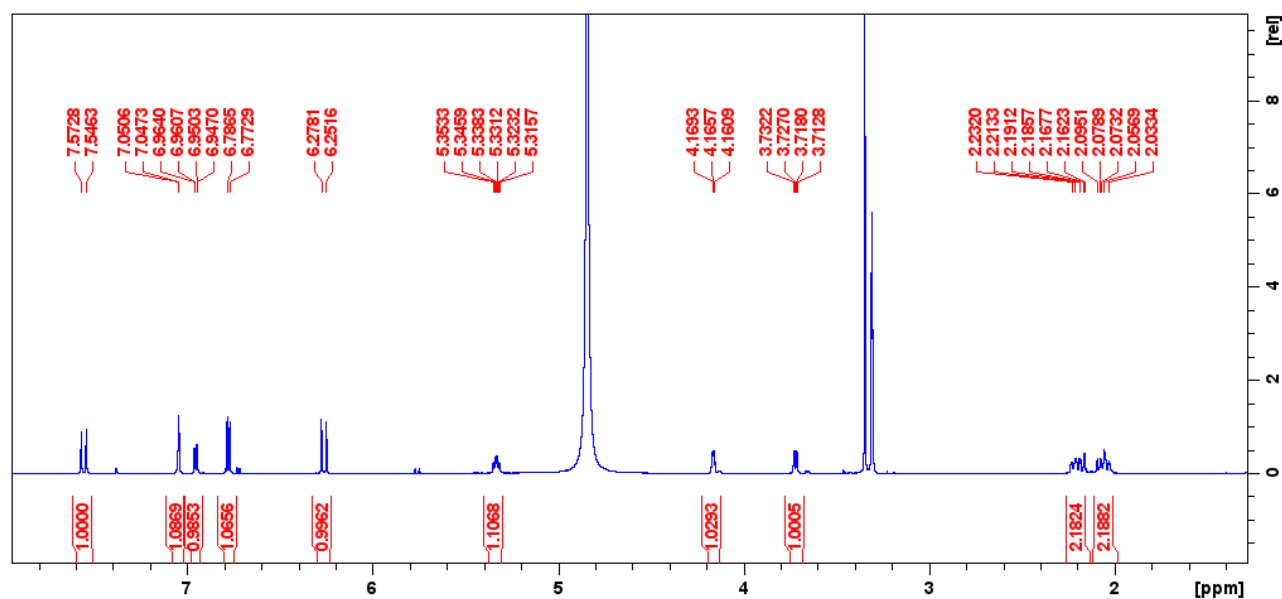

**Figure S20.** <sup>1</sup>H-NMR spectrum of chlorogenic acid (7) (<sup>1</sup>H-NMR:600 MHz; CD<sub>3</sub>OD)

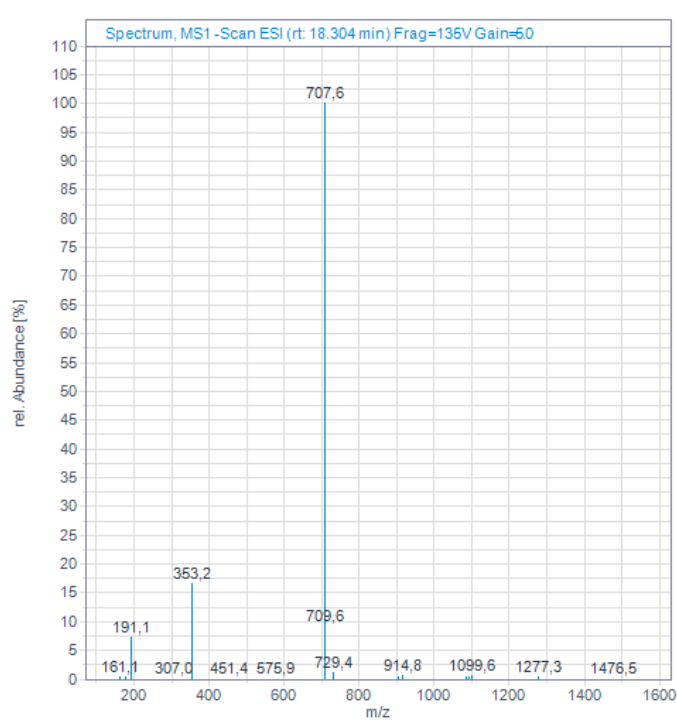

**Figure S21.** MS spectrum of chlorogenic acid (7) in negative mode. The major ions of 707 and 353 correspond to [2M-H]<sup>-</sup> and [M-H]<sup>-</sup>, whereas the ion of m/z=191 is a fragment corresponding to quinic acid.

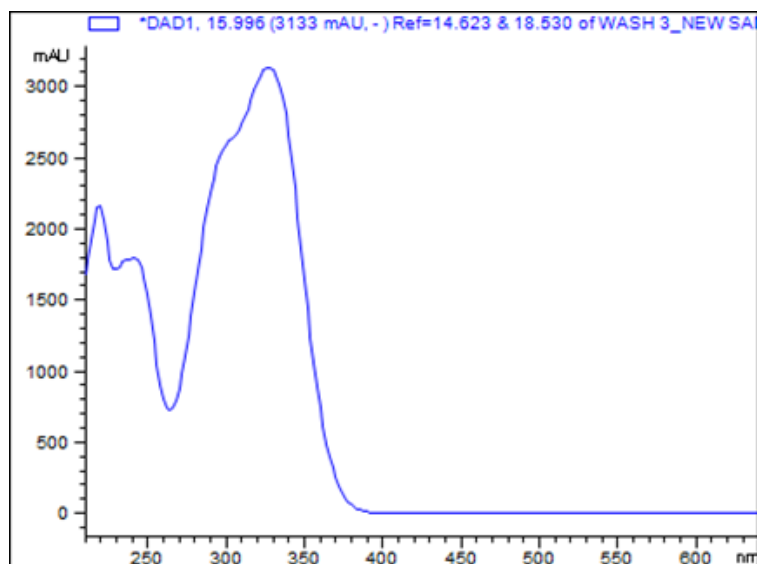

**Figure S22.** UV-vis spectrum of chlorogenic acid (**7**) showing maximum absorbance at 330 nm.

**Verbascoside (8)**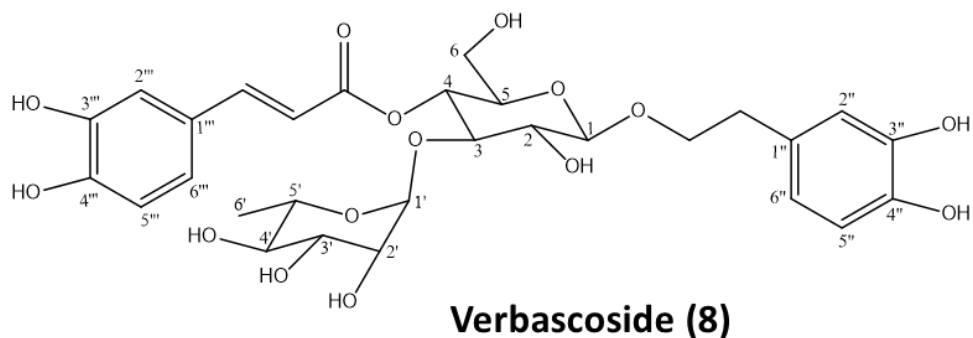**Table S8.**  $^1\text{H}$ -NMR,  $^{13}\text{C}$ -NMR and APT-NMR data of verbascoside (8) ( $\text{D}_2\text{O}$ )

| Position | $\delta_{\text{H}}$ (ppm, $J$ in Hz)     | APT           | $\delta_{\text{C}}$ (ppm) |
|----------|------------------------------------------|---------------|---------------------------|
| 1'''     |                                          | C             | 126.16                    |
| 2'''     | 7.12 (d, $J=1.9$ )                       | CH            | 115.18                    |
| 3'''     |                                          | C             | 147.73                    |
| 4'''     |                                          | C             | 147.52                    |
| 5'''     | 6.86 (d, $J=8.2$ )                       | CH            | 116.23                    |
| 6'''     | 7.06 (dd, $J=8.3, 2$ )                   | CH            | 123.20                    |
| 7'''     | 7.61 (d, $J=15.9$ )                      | CH            | 147.52                    |
| 8'''     | 6.31 (d, $J=15.9$ )                      | CH            | 113.67                    |
| 1''      |                                          | C             | 131.46                    |
| 2''      | 6.79-6.78 (m)                            | CH            | 116.75                    |
| 3''      |                                          | C             | 143.88                    |
| 4''      |                                          | C             | 142.31                    |
| 5''      | 6.79-6.78 (m)                            | CH            | 116.29                    |
| 6''      | 6.68 (dd, $J=8.1, 1.8$ )                 | CH            | 121.20                    |
| 7''      | 2.75 (t, $J=6.7$ )                       | $\text{CH}_2$ | 34.43                     |
| 8''      | 4.03-3.98 (m), 3.81-3.77 (m)             | $\text{CH}_2$ | 71.08                     |
| 1        | 4.41 (d, $J=8.1$ )                       | CH            | 102.02                    |
| 2        | 3.43-3.37 (m)                            | CH            | 73.92                     |
| 3        | 3.76-3.75 (m)                            | CH            | 80.76                     |
| 4        | 4.88 (t, $J=9.6$ )                       | CH            | 68.76                     |
| 5        | 3.58-3.53 (m)                            | CH            | 73.64                     |
| 6        | 3.62 (dd, $J=12.3, 2.1$ ), 3.49-3.46 (m) | $\text{CH}_2$ | 60.10                     |
| 1'       | 5.03 (d, $J=1.5$ )                       | CH            | 101.57                    |
| 2'       | 3.92-3.91 (m)                            | CH            | 70.25                     |
| 3'       | 3.58-3.53 (m)                            | CH            | 69.82                     |
| 4'       | 3.25 (t, $J=9.6$ )                       | CH            | 71.72                     |
| 5'       | 3.43-3.37 (m)                            | CH            | 69.43                     |
| 6'       | 0.96 (d, $J=6.2$ )                       | $\text{CH}_2$ | 17.08                     |

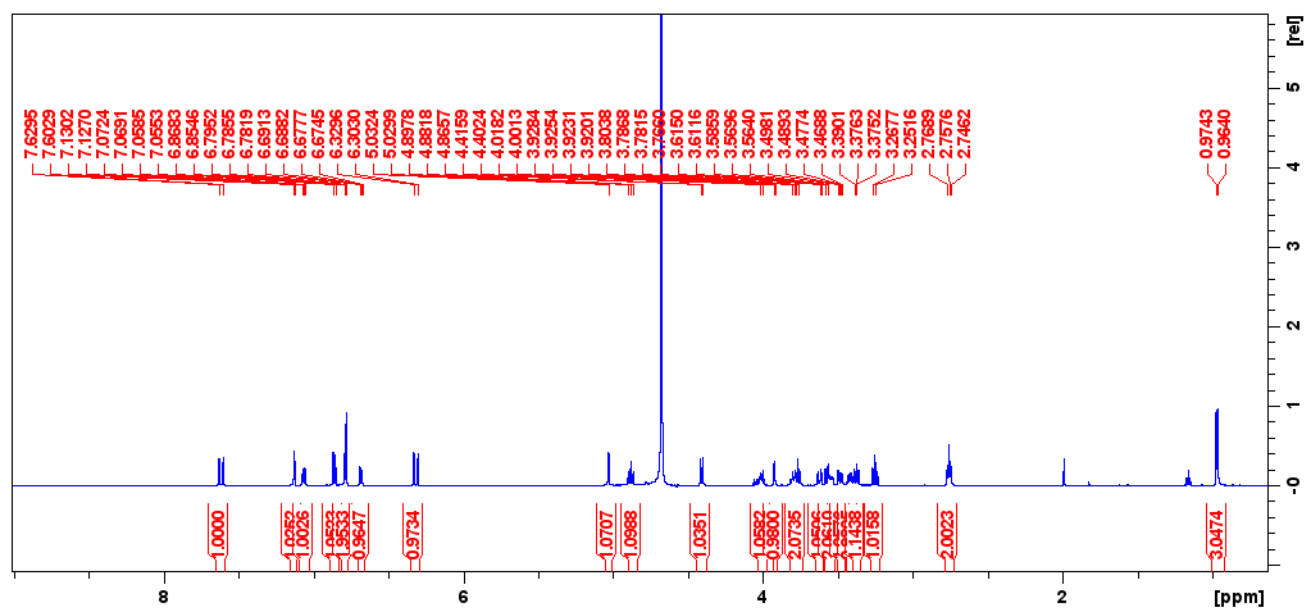

**Figure S23.** <sup>1</sup>H-NMR spectrum of verbascoside (8) (<sup>1</sup>H-NMR:600 MHz; D<sub>2</sub>O)

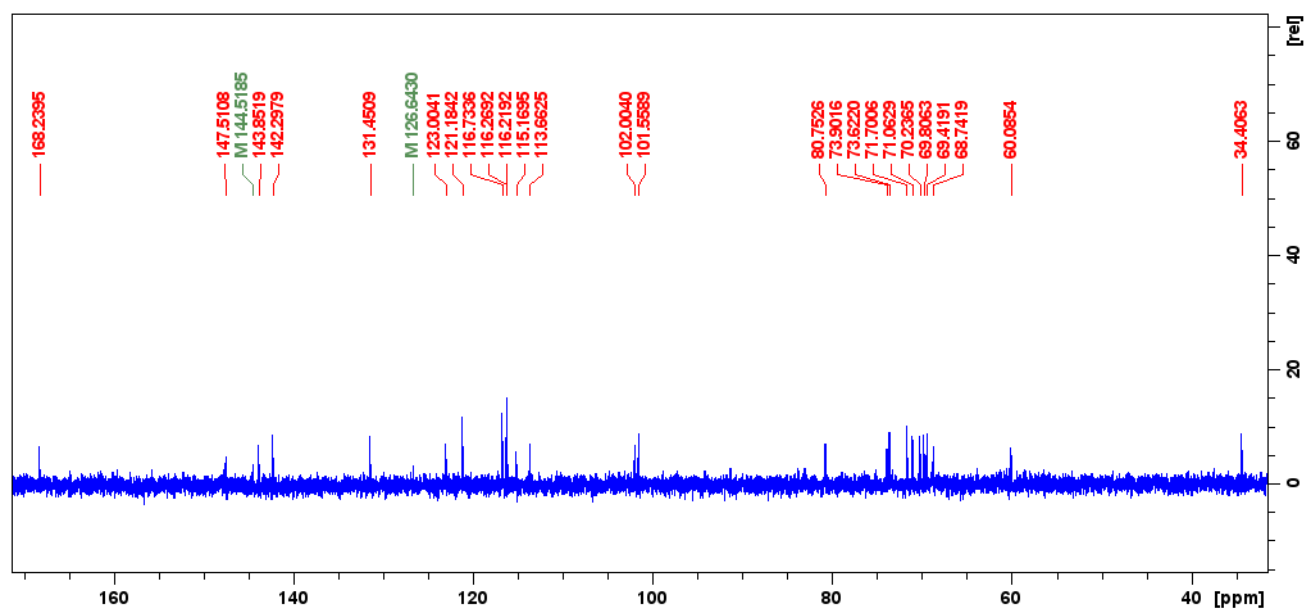

**Figure S24.** <sup>13</sup>C-NMR spectrum of verbascoside (8) (<sup>13</sup>C-NMR:150 MHz; D<sub>2</sub>O)

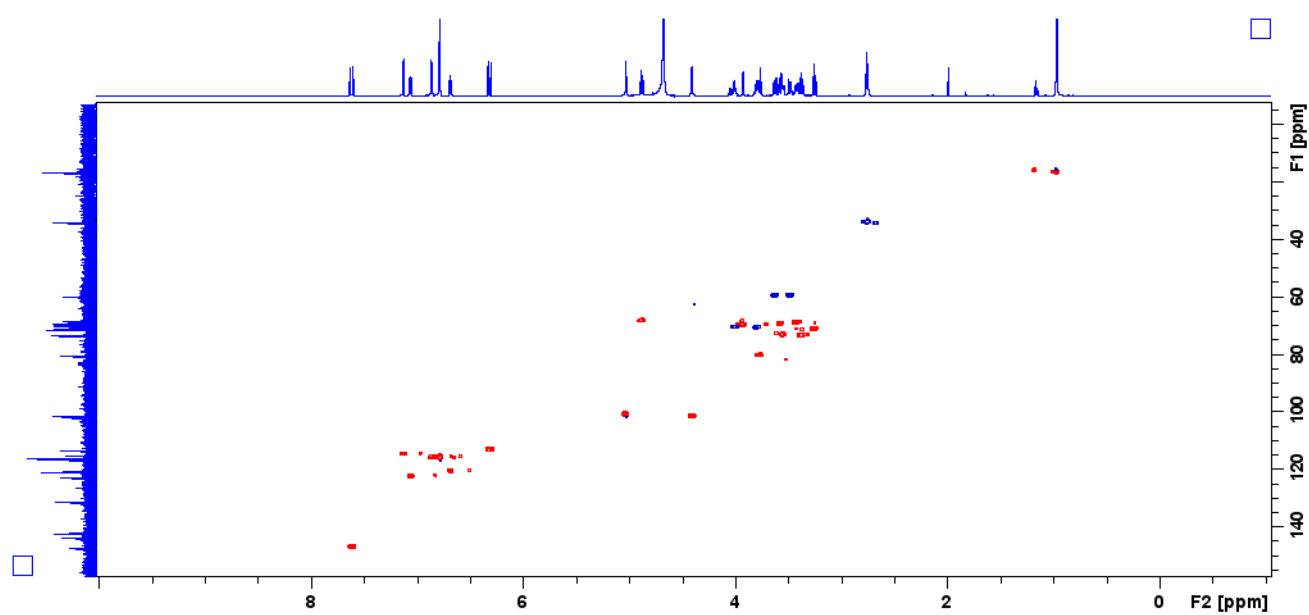

**Figure S25.** HSQC-NMR spectrum of verbascoside (8) (D<sub>2</sub>O)

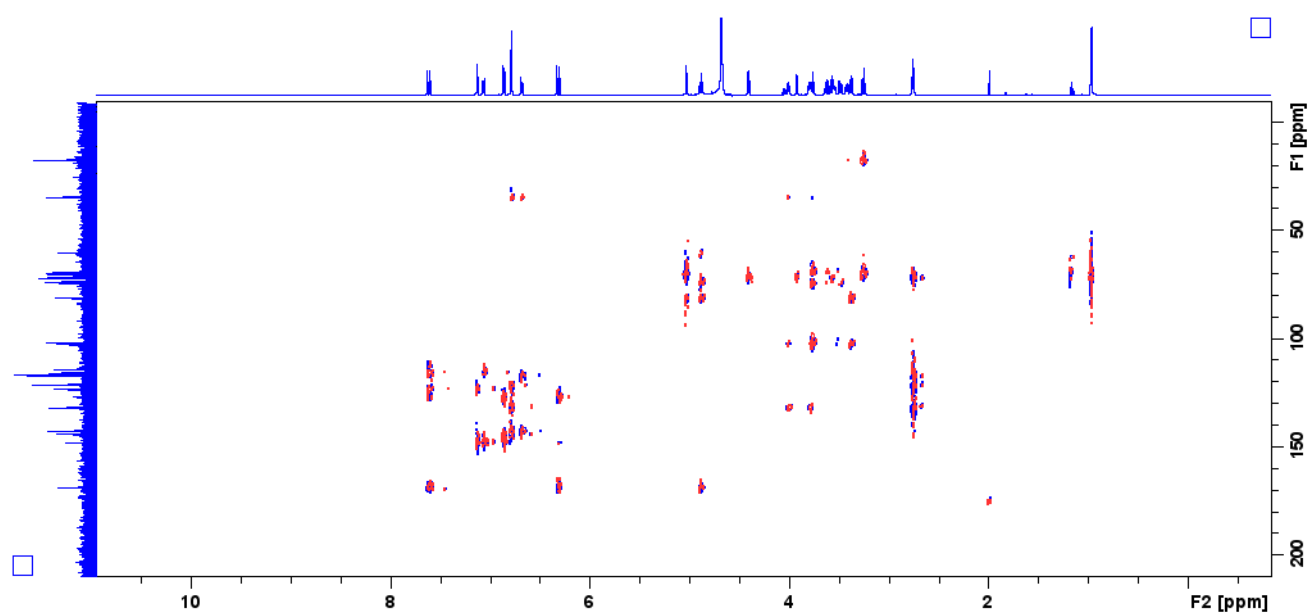

**Figure S26.** HMBC-NMR spectrum of verbascoside (8) (D<sub>2</sub>O)

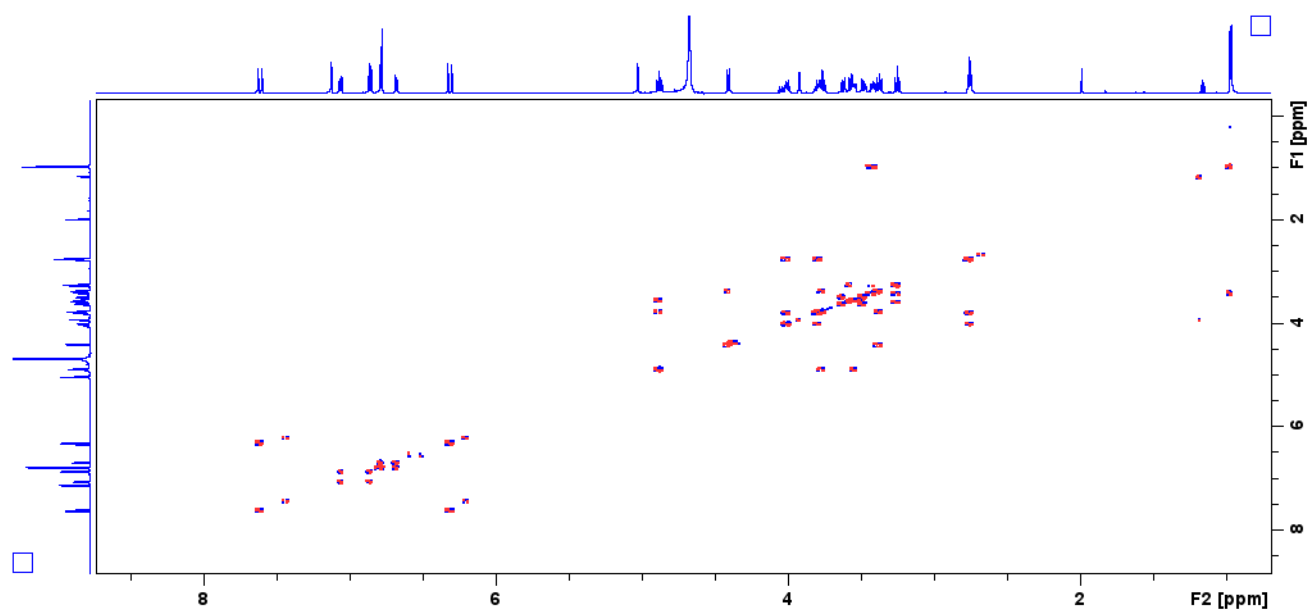

**Figure S27.** COSY-NMR spectrum of verbascoside (8) (D<sub>2</sub>O)

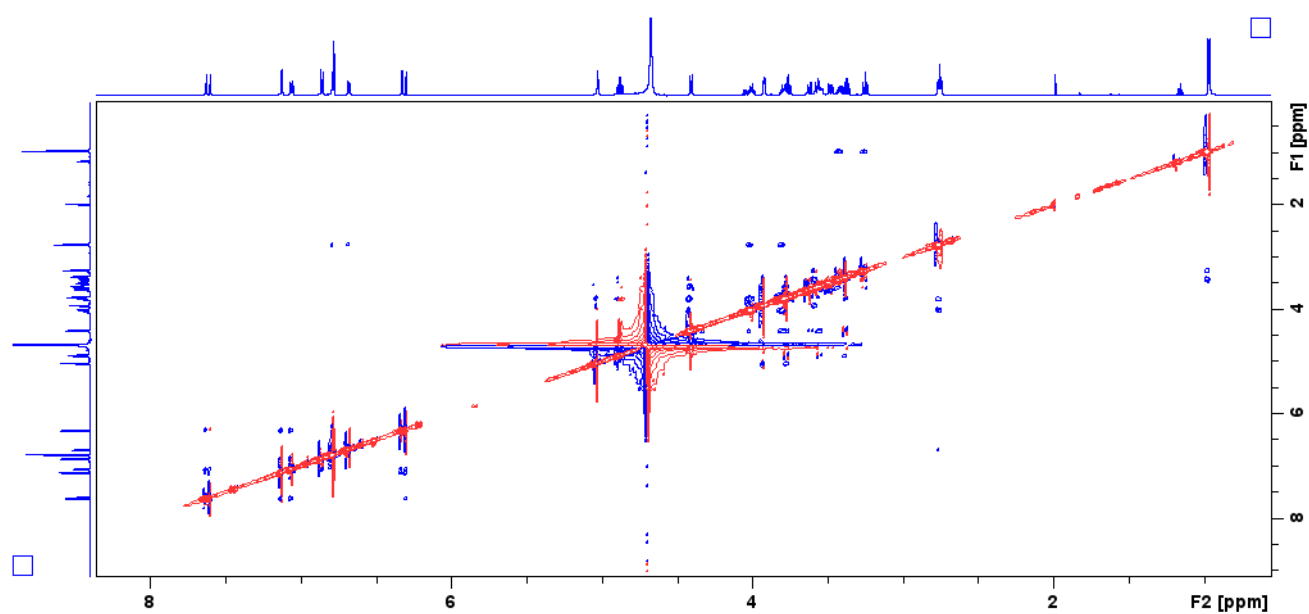

**Figure S28.** ROESY- NMR spectrum of verbascoside (8) (D<sub>2</sub>O)

## SUPPLEMENTARY INFORMATION

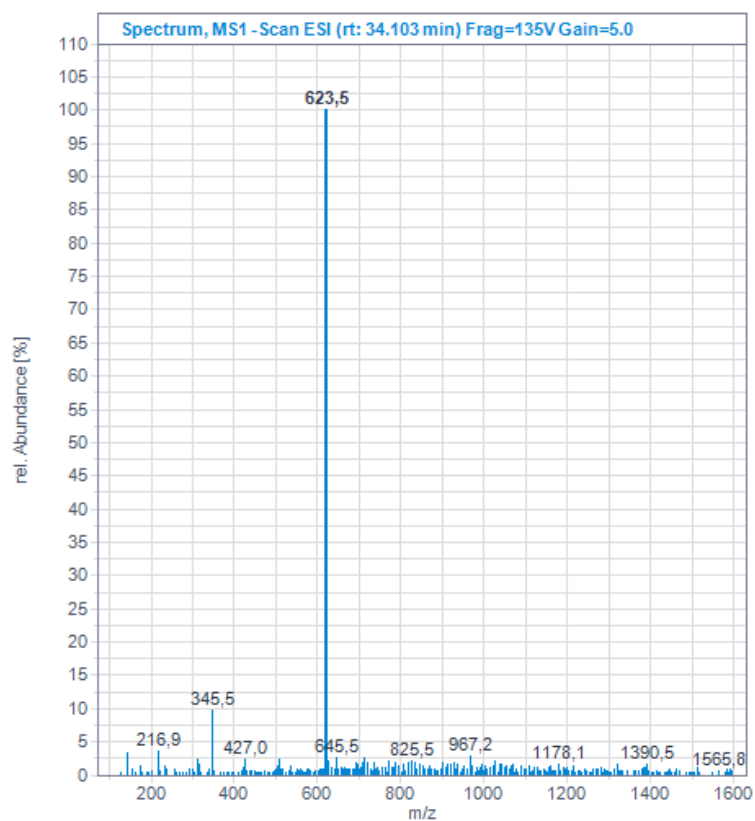

**Figure S29.** MS spectrum of verbascoside (8) in negative mode with the sole ion of 623  $[M-H]^-$ .

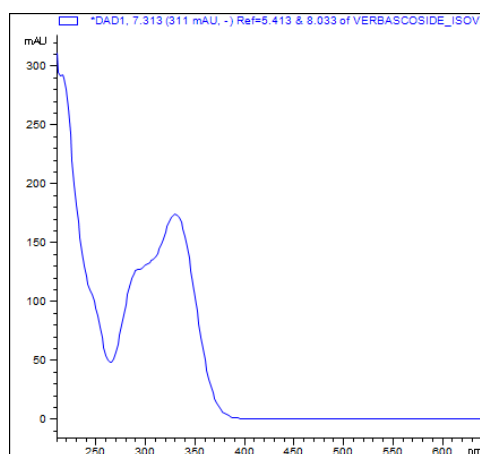

**Figure S30.** UV spectrum of verbascoside (8) showing maximum absorbance at 210 and 330 nm.



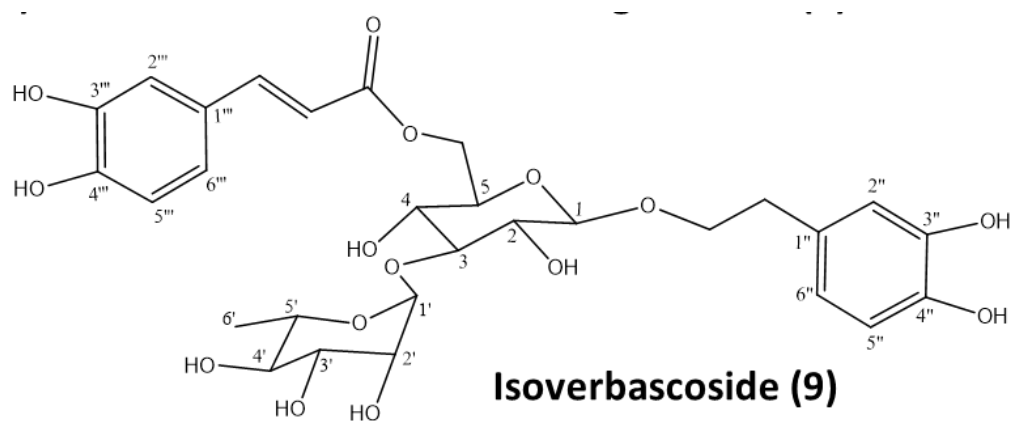**Table S9.**  $^1\text{H}$ -NMR,  $^{13}\text{C}$ -NMR and APT-NMR data of isoverbascoside (9) ( $\text{D}_2\text{O}$ )

| Position | $\delta_{\text{H}}$ (ppm, $J$ in Hz) | APT           | $\delta_{\text{C}}$ (ppm) |
|----------|--------------------------------------|---------------|---------------------------|
| 1'''     |                                      | C             | 126.68                    |
| 2'''     | 7.01 (s)                             | CH            | 115.18                    |
| 3'''     |                                      | C             | 147.15                    |
| 4'''     |                                      | C             | 144.16                    |
| 5'''     | 6.83 (s)                             | CH            | 116.01                    |
| 6'''     | 6.83 (s)                             | CH            | 122.69                    |
| 7'''     | 7.46 (d, $J=16$ )                    | CH            | 146.29                    |
| 8'''     | 6.23 (d, $J=16$ )                    | CH            | 113.95                    |
| 1''      |                                      | C             | 130.77                    |
| 2''      | 6.72 (s)                             | CH            | 116.58                    |
| 3''      |                                      | C             | 143.73                    |
| 4''      |                                      | C             | 142.20                    |
| 5''      | 6.68 (d, $J=7.9$ )                   | CH            | 116.01                    |
| 6''      | 6.56 (d, $J=7.7$ )                   | CH            | 121.01                    |
| 7''      | 2.74 (t, $J=7.3$ )                   | $\text{CH}_2$ | 34.82                     |
| 8''      | 3.91-3.87 (m), 3.83-3.76 (m)         | $\text{CH}_2$ | 71.45                     |
| 1        | 4.50-4.44 (m)                        | CH            | 102.2                     |
| 2        | 3.42 (t, $J=8.5$ )                   | CH            | 73.62                     |
| 3        | 3.62 (t, $J=9$ )                     | CH            | 82.32                     |
| 4        | 3.53-3.47 (m)                        | CH            | 68.69                     |
| 5        | 3.69 (t, $J=9$ )                     | CH            | 73.38                     |
| 6        | 4.50-4.44 (m), 4.40-4.37 (m)         | $\text{CH}_2$ | 63.40                     |
| 1'       | 5.16 (s)                             | CH            | 101.09                    |
| 2'       | 4.08 (s)                             | CH            | 70.32                     |
| 3'       | 3.83-3.76 (m)                        | CH            | 70.17                     |
| 4'       | 3.53-3.47 (m)                        | CH            | 71.96                     |
| 5'       | 4.06-4.02 (m)                        | CH            | 68.85                     |
| 6'       | 1.29 (d, $J=6.2$ )                   | $\text{CH}_2$ | 16.49                     |

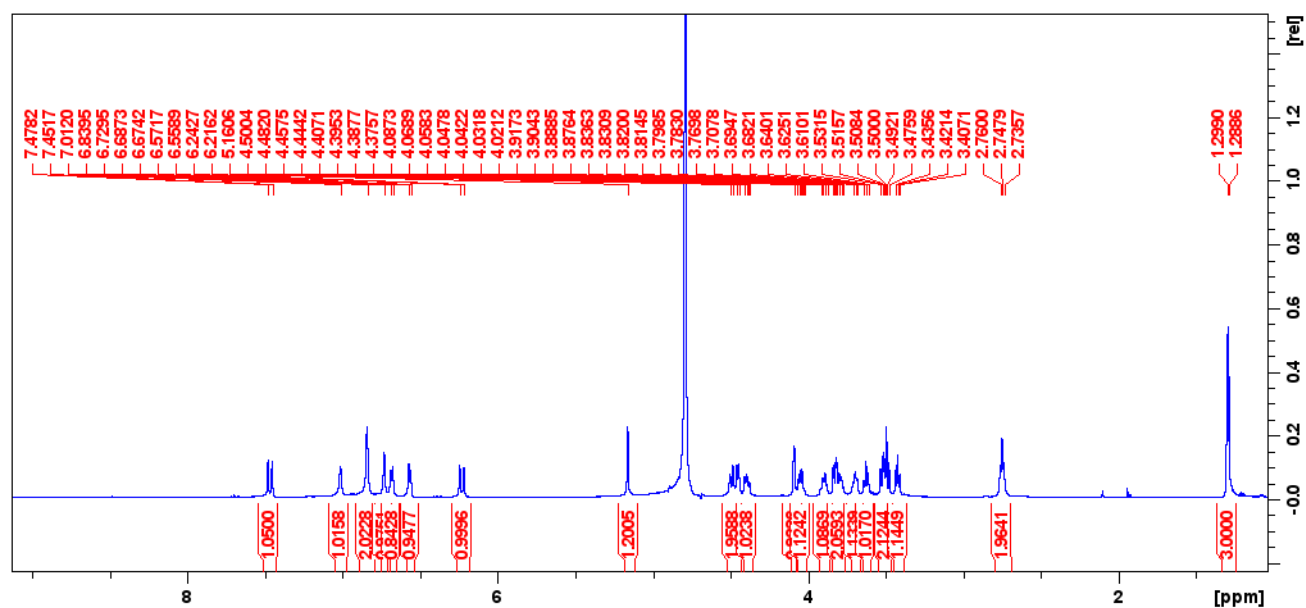

**Figure S31.**  $^1\text{H}$ -NMR spectrum of isoverbascoside (9) ( $^1\text{H}$ -NMR:600 MHz;  $\text{D}_2\text{O}$ )

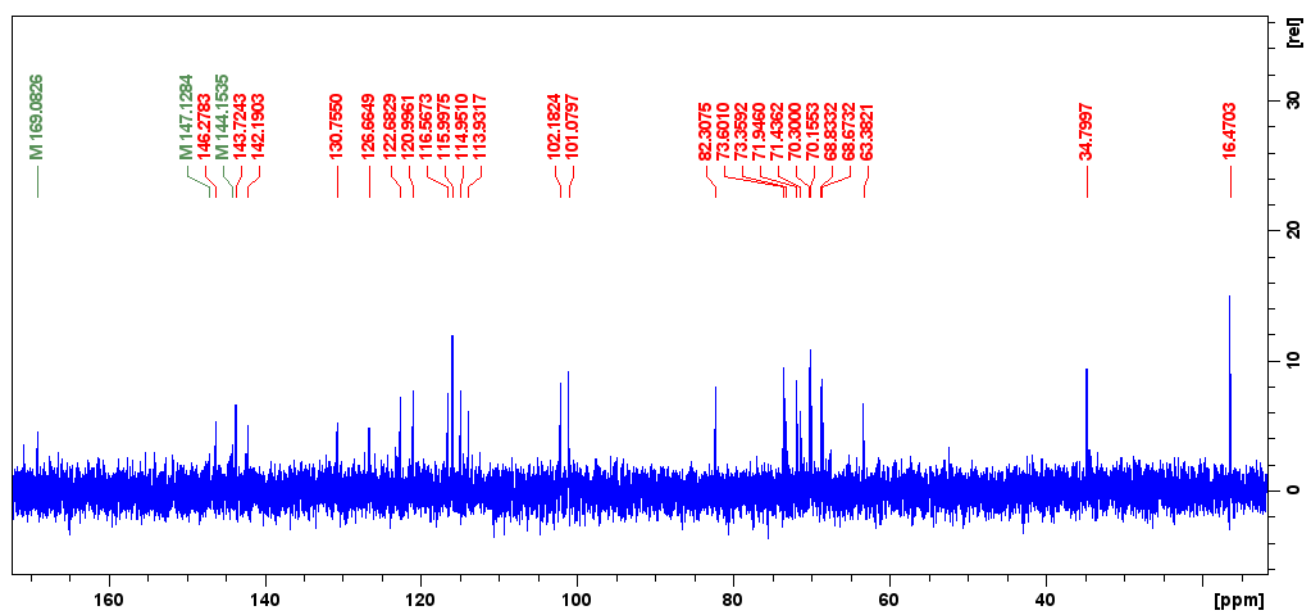

**Figure S32.**  $^{13}\text{C}$ -NMR spectrum of isoverbascoside (9) ( $^{13}\text{C}$ -NMR:150 MHz;  $\text{D}_2\text{O}$ )

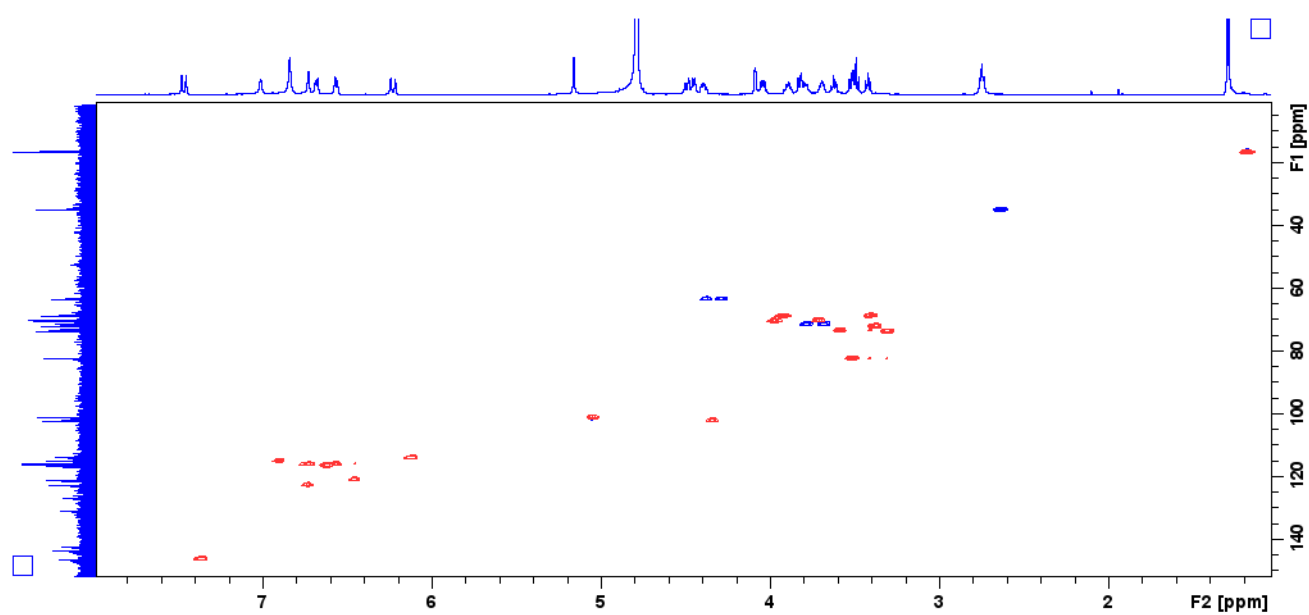

**Figure S33.** HSQC-NMR spectrum of isoverbascoside (9) (D<sub>2</sub>O)

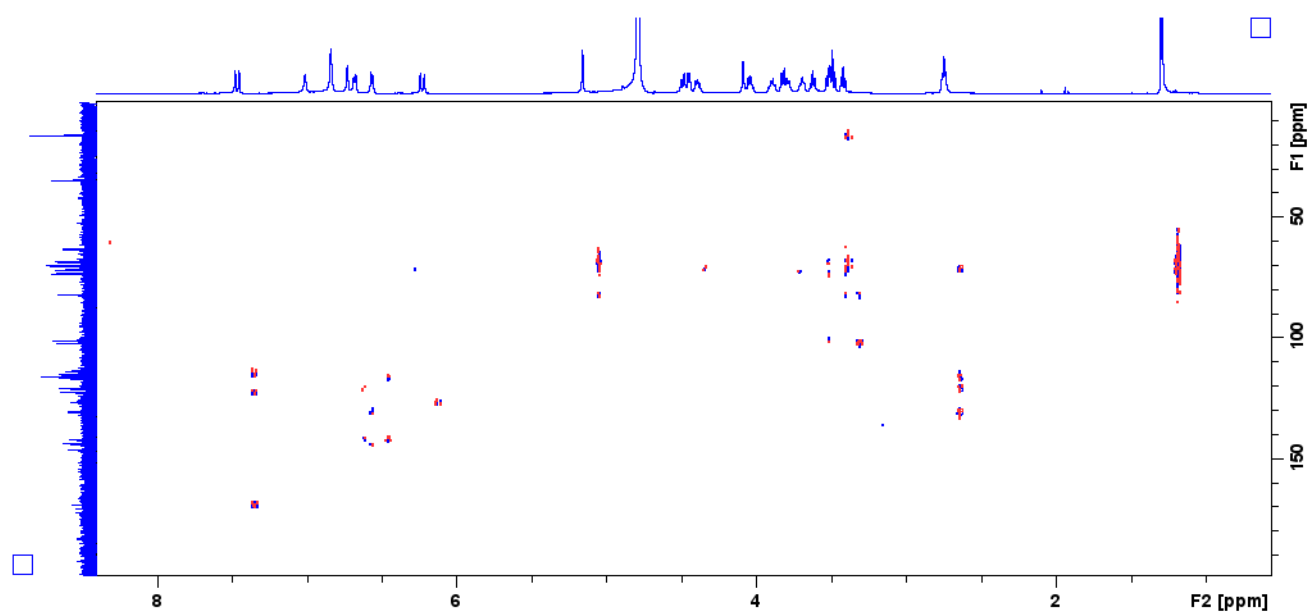

**Figure S34.** HMBC-NMR spectrum of isoverbascoside (9) (D<sub>2</sub>O)

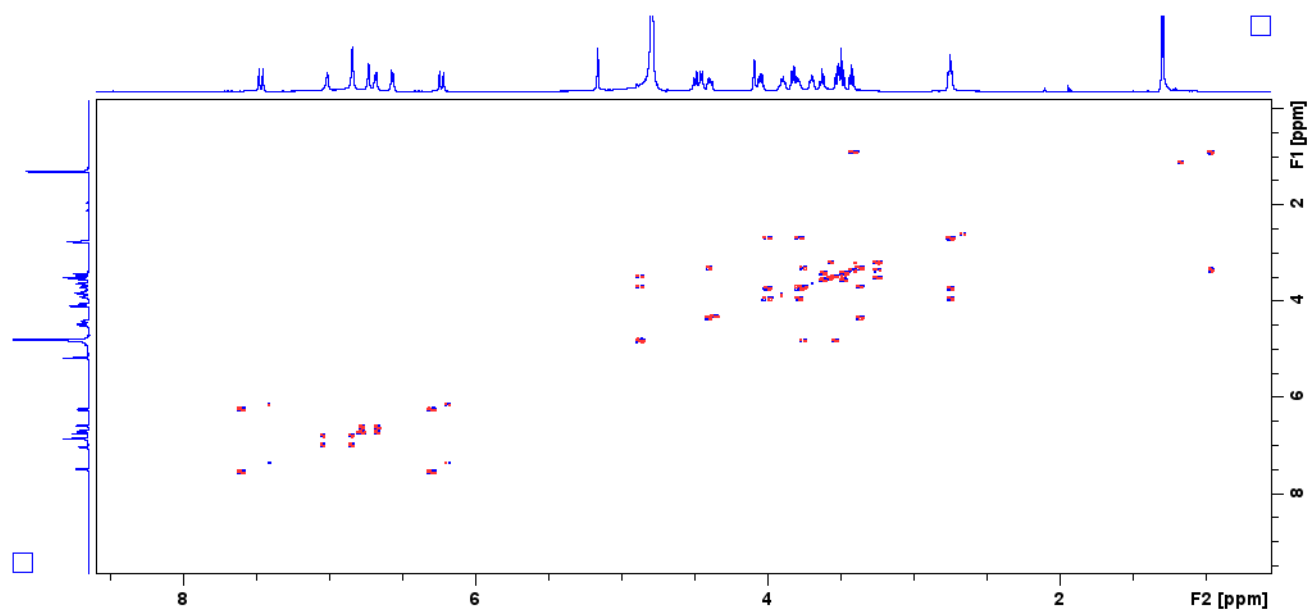

**Figure S35.** COSY-NMR spectrum of isoverbascoside (9) ( $D_2O$ )

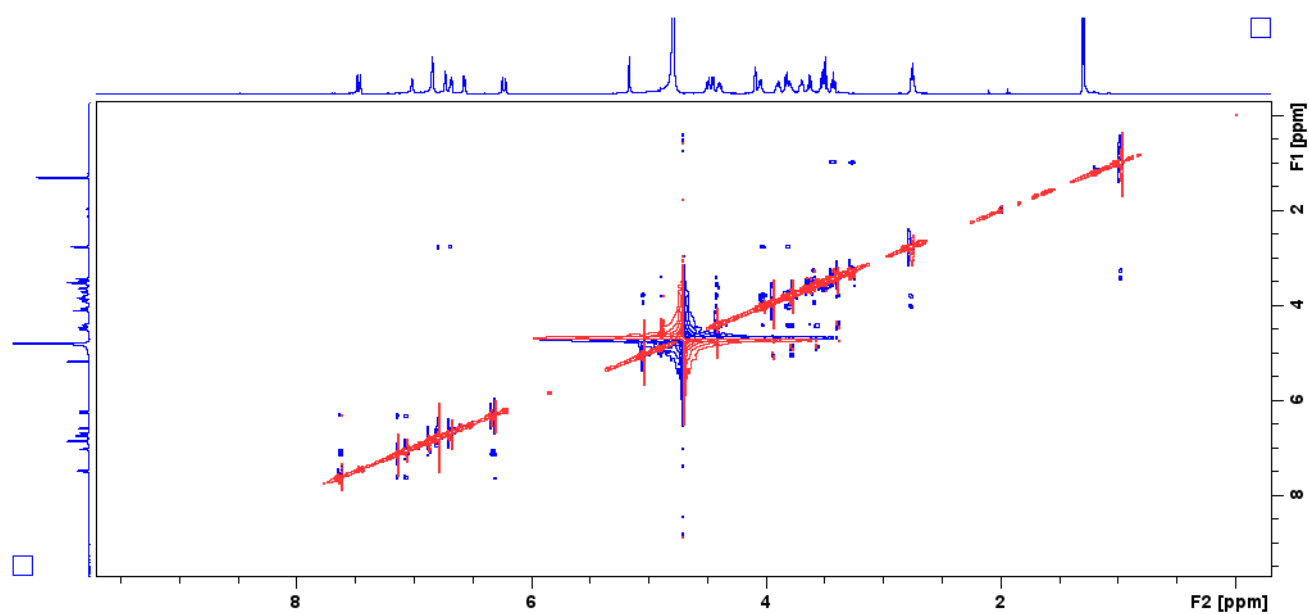

**Figure S36.** ROESY- NMR spectrum of isoverbascoside (9) ( $D_2O$ )

## SUPPLEMENTARY INFORMATION

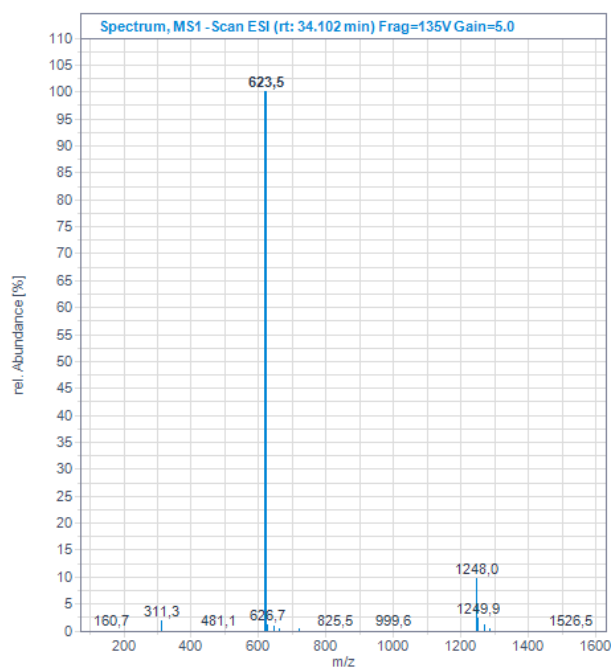

**Figure S37.** MS spectrum of isoverbascoside (9) in negative mode with the main ion of of 623  $[M-H]^-$ .

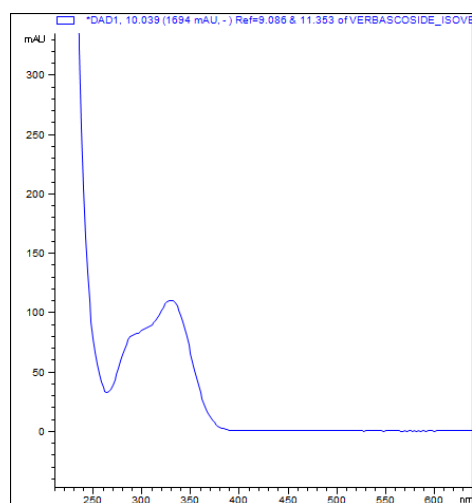

**Figure S38.** UV-vis spectrum of isoverbascoside (9) showing absorbance maxima at 210 and 330 nm.

Part B. Other Data

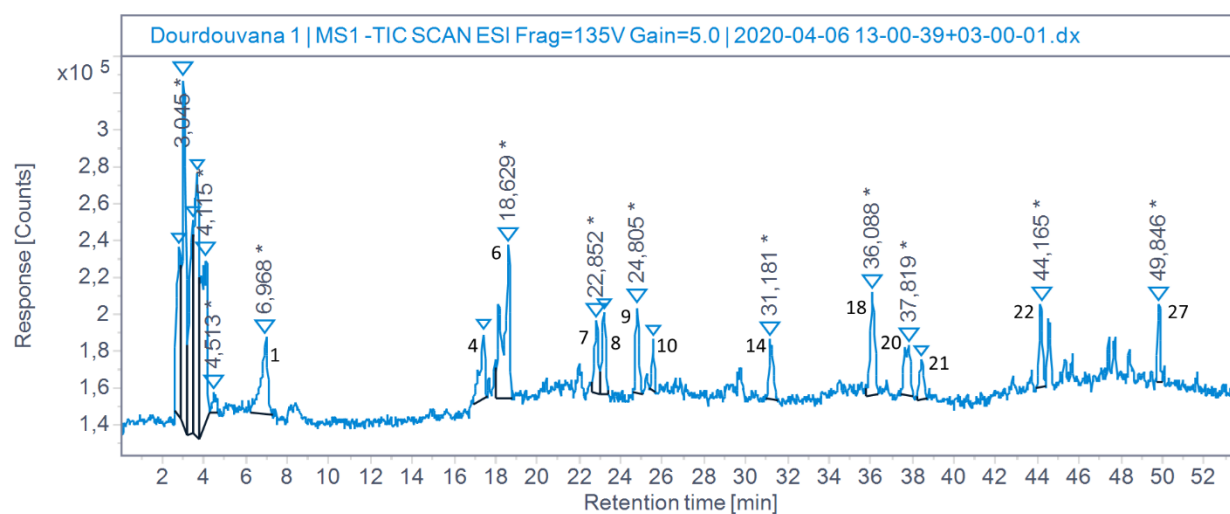

**Figure S39.** Total ion chromatogram (TIC) in negative mode of *Sideritis clandestina* subsp. *peloponnesiaca* (SCP) aqueous extract.
